# Supplementary material for: Variations induced by the use of unstable surface do not facilitate motor adaptation to a throwing skill
Source: PeerJ. 2023 Jan 13;11:e14434. doi: 10.7717/peerj.14434 (PMC9841905; doi:10.7717/peerj.14434)
Supplement: Supplemental Information 1 — (A) Measurement on floor. (B) Measurement on bosu. (1) Pretest. (2) Postest. [file peerj-11-14434-s001.xlsx]

## Sheet: DataBase_Mean_SD
Participant	Practice	#practice	MRE_A1	MRE_B1	MRE_A2	MRE_B2	TOTAL_MRE_PRE	TOTAL_MRE_POST	MRE_A1_SD	MRE_B1_SD	MRE_A2_SD	MRE_B2_SD	TOTAL_SD_MRE_PRE	TOTAL_SD_MRE_POST	FuzzyEn_FX_1A	FuzzyEn_FX_1B	FuzzyEn_FX_2A	FuzzyEn_FX_2B	FuzzyEn_FY_1A	FuzzyEn_FY_1B	FuzzyEn_FY_2A	FuzzyEn_FY_2B	VEL_HAND_X_1A	VEL_HAND_Y_1A	VEL_HAND_Z_1A	VELTOTAL_HAND_1A	VEL_HAND_X_1B	VEL_HAND_Y_1B	VEL_HAND_Z_1B	VELTOTAL_HAND_1B	VEL_HAND_X_2A	VEL_HAND_Y_2A	VEL_HAND_Z_2A	VELTOTAL_HAND_2A	VEL_HAND_X_2B	VEL_HAND_Y_2B	VEL_HAND_Z_2B	VELTOTAL_HAND_2B	SD_VEL_HAND_X_1A	SD_VEL_HAND_Y_1A	SD_VEL_HAND_Z_1A	SD_VELTOTAL_HAND_1A	SD_VEL_HAND_X_1B	SD_VEL_HAND_Y_1B	SD_VEL_HAND_Z_1B	SD_VELTOTAL_HAND_1B	SD_VEL_HAND_X_2A	SD_VEL_HAND_Y_2A	SD_VEL_HAND_Z_2A
2	BOSU	2	10.111	12.1201	9.32879	7.93904	11.1155	8.63392	6.47619	8.00865	4.97563	4.35748	7.24242	4.66656	0.61029	1.1859	0.765224	1.11751	0.800932	1.42982	0.923144	1.27508	0.090623	1.54936	-0.912169	1.80208	0.108424	1.43453	-0.907936	1.70321	0.085147	1.36022	-1.01937	1.7033	0.057564	1.33339	-0.975205	1.65414	0.063075	0.072018	0.075934	0.0741829	0.038184	0.089639	0.055837	0.0890204	0.040132	0.07199	0.0532125
3	BOSU	2	10.6352	8.88366	7.41571	7.42573	9.75944	7.42072	5.85349	6.11053	4.01906	4.22756	5.98201	4.12331	0.807857	0.823573	1.1553	0.81775	0.96373	0.940677	1.30772	0.850294	0.055385	1.4256	-1.0497	1.77371	0.0509465	1.42854	-0.987564	1.73962	0.101305	1.50168	-1.0686	1.84744	0.0736315	1.49727	-1.08347	1.8519	0.019924	0.087624	0.066956	0.0972383	0.033235	0.0615545	0.04113	0.0513379	0.0275685	0.058758	0.0373745
4	BOSU	2	12.935	17.0608	8.7312	11.0867	14.9979	9.90895	6.53003	11.6639	4.37969	4.79351	9.09694	4.5866	0.604803	1.06719	0.620444	0.978077	0.819371	1.28647	0.725128	1.17955	0.207956	1.48232	-1.09644	1.85623	0.167281	1.53373	-1.0398	1.86264	0.198712	1.46062	-1.04585	1.80966	0.200839	1.45586	-1.02394	1.79278	0.0471735	0.102359	0.081316	0.0776363	0.048006	0.063511	0.0795055	0.058201	0.025843	0.041854	0.071471
5	BOSU	2	7.92746	8.83875	10.0867	11.4642	8.3831	10.7755	4.39186	4.64262	5.0642	6.62131	4.51724	5.84275	0.713479	1.26535	0.689564	1.13159	0.701113	1.51106	0.752238	1.40099	0.0962525	1.4989	-1.05104	1.83692	0.069367	1.49701	-1.04448	1.82977	0.118609	1.49165	-1.01179	1.80816	0.0719135	1.35441	-1.07271	1.73173	0.024488	0.0559395	0.039649	0.0566754	0.0330105	0.0787495	0.049728	0.05639	0.02709	0.0457655	0.0519095
8	BOSU	2	12.1247	11.4435	8.7688	8.564	11.7841	8.6664	6.32224	6.08182	4.53656	4.93426	6.20203	4.73541	0.431163	0.897757	0.405173	0.804523	0.428569	0.99306	0.452502	0.910783	0.228276	1.6813	-0.618786	1.80944	0.112862	1.71822	-0.709472	1.86695	0.162158	1.59788	-0.679341	1.74628	0.143729	1.63097	-0.688177	1.78002	0.0510315	0.0648495	0.0773095	0.0616878	0.0238755	0.055748	0.0377095	0.0484378	0.019021	0.058816	0.0283345
11	BOSU	2	6.24931	7.71029	5.29574	4.71799	6.9798	5.00686	3.17085	3.96801	3.05349	2.61036	3.56943	2.83192	1.03846	0.566987	1.11337	0.611554	1.27084	0.521274	1.2687	0.549832	0.0913425	1.50571	-0.914591	1.76534	0.0589025	1.45158	-0.922548	1.72228	0.101454	1.59207	-0.946221	1.85663	0.0914535	1.55453	-0.972	1.83723	0.0327025	0.057553	0.0482565	0.0546058	0.0385715	0.0619725	0.0462535	0.0568583	0.0235015	0.045431	0.0375825
13	BOSU	2	14.7446	15.292	5.8496	4.29729	15.0183	5.07344	11.6948	12.1729	2.80462	2.41532	11.9339	2.60997	0.883923	1.44264	1.2187	0.96522	0.579916	1.42915	0.977754	0.69674	0.159511	1.5568	-1.13932	1.93895	0.124783	1.47728	-1.10255	1.85017	0.149615	1.48538	-1.15619	1.88946	0.142186	1.47664	-1.17331	1.89204	0.032826	0.0514135	0.082586	0.0645628	0.0494065	0.120406	0.057082	0.117573	0.028572	0.040254	0.061152
16	BOSU	2	4.31702	4.92784	3.86241	4.40489	4.62243	4.13365	1.82789	2.54528	2.02242	2.43259	2.18659	2.22751	0.630288	1.05426	0.579221	0.672671	0.680659	1.1989	0.667637	0.802461	-0.0026825	1.29459	-0.93057	1.59561	-0.0273165	1.25003	-0.967735	1.58245	0.0068	1.31231	-0.870549	1.57603	0.0067185	1.25418	-0.881082	1.53311	0.0369755	0.059618	0.0455155	0.0598517	0.039779	0.100667	0.103266	0.127333	0.0424455	0.0548815	0.0535505
17	BOSU	2	4.95883	5.79685	2.98645	3.94502	5.37784	3.46574	2.83431	2.53003	1.99838	2.40193	2.68217	2.20015	0.540258	0.888488	0.459703	0.810823	0.449302	0.885687	0.393381	0.865818	0.0246775	1.51954	-0.943707	1.78965	0.004997	1.46794	-1.01666	1.78636	0.041791	1.55693	-0.926088	1.81261	0.013903	1.50872	-1.01595	1.81988	0.0269805	0.039855	0.0432015	0.0418882	0.0309485	0.044837	0.0454935	0.040849	0.0278165	0.070747	0.0459575
21	BOSU	2	6.56158	8.45978	3.80159	5.78968	7.51068	4.79564	3.79316	4.26003	1.91765	2.22849	4.0266	2.07307	0.714446	1.33092	1.27079	1.05164	0.487972	1.31689	1.44677	0.958125	0.043991	1.33813	-0.998989	1.67345	0.0097405	1.30715	-1.09107	1.70853	0.08196	1.42389	-0.947566	1.71761	0.0511495	1.31313	-0.963934	1.6308	0.033345	0.066935	0.0744165	0.0476015	0.039096	0.102206	0.063207	0.0867864	0.034183	0.0666605	0.0675265
22	BOSU	2	3.42386	5.84621	4.32427	4.41257	5.75367	4.36842	1.97591	2.8504	2.52965	2.17853	2.41315	2.35409	0.53286	1.02021	0.498227	0.773103	0.467809	1.09893	0.448437	0.872201	0.011603	1.61233	-0.878409	1.83691	0.00172	1.53781	-1.00308	1.83675	0.0492855	1.54191	-0.797401	1.73994	0.0366595	1.51296	-0.839925	1.73173	0.029258	0.043993	0.041242	0.0373527	0.0230645	0.053821	0.036137	0.0500857	0.0203495	0.0353025	0.038773
23	BOSU	2	4.22439	5.55089	3.3547	4.75283	4.88764	4.05376	2.02447	2.84356	2.30838	2.88603	2.43402	2.59721	0.673209	1.10405	0.669294	1.00374	0.692217	1.31947	0.570261	1.16535	0.073192	1.38554	-1.04453	1.73762	0.059301	1.29342	-1.09211	1.6946	0.107598	1.37778	-1.06555	1.74555	0.083397	1.29669	-1.14069	1.7297	0.0324655	0.039597	0.036897	0.0484607	0.0334655	0.045279	0.046182	0.0403421	0.0210515	0.0407765	0.0457735
1	FLOOR	1	6.69774	9.91536	5.75524	5.80292	8.30655	5.77908	4.54837	4.63279	2.97545	2.88207	4.59058	2.92876	0.569548	1.27923	0.541342	1.09576	0.579722	1.44256	0.525842	1.41397	0.0411175	1.47774	-0.815179	1.68959	-0.007011	1.27915	-0.852579	1.53827	0.0365215	1.46293	-0.832962	1.68456	-0.0108225	1.41311	-0.867712	1.659	0.02242	0.0459295	0.064388	0.0411961	0.0259215	0.0677555	0.028735	0.0594065	0.018492	0.060513	0.038609
6	FLOOR	1	9.11848	10.7674	4.78207	5.79991	9.94293	5.29099	3.61859	5.31779	2.09771	2.35111	4.46819	2.22441	0.798347	0.986148	0.751535	0.967471	0.678498	1.29447	0.678829	1.29848	0.024428	1.35885	-0.860901	1.60944	-0.00556	1.28262	-0.915543	1.57771	0.06052	1.40563	-0.821855	1.63	0.0482095	1.36373	-0.893093	1.63155	0.037655	0.0579045	0.053645	0.0444164	0.0462455	0.0823685	0.0527885	0.0677715	0.0480435	0.073055	0.054405
7	FLOOR	1	8.51774	16.5112	7.39785	9.84452	12.5145	8.62119	4.66889	12.3081	5.37322	5.14743	8.48851	5.26033	1.1603	0.398249	0.720395	0.846073	1.38677	0.604944	0.984738	1.10194	0.076443	1.61443	-1.03108	1.91918	0.0313255	1.52828	-1.04435	1.85318	0.002143	1.51672	-0.976496	1.80467	-0.0244835	1.50132	-0.998625	1.80402	0.030608	0.0893695	0.0534665	0.0820678	0.032932	0.069477	0.0636335	0.0706324	0.029471	0.0751325	0.0658485
9	FLOOR	1	5.47473	7.03239	5.45839	5.35514	6.25356	5.40676	2.13681	3.54777	3.40087	3.20299	2.84229	3.30193	0.415481	0.675167	0.37008	0.574829	0.69482	0.420734	0.678647	0.438607	-0.0110075	1.70029	-0.88169	1.91665	-0.0239065	1.60781	-0.953173	1.87086	-0.040442	1.61775	-0.80598	1.80897	-0.0282725	1.48882	-0.888408	1.73734	0.029817	0.064516	0.039036	0.0546272	0.022436	0.089145	0.092491	0.0670622	0.0503655	0.0687925	0.0592995
12	FLOOR	1	6.34913	11.8692	4.70782	6.11833	9.10918	5.41308	2.64016	6.77309	2.70969	3.14534	4.70662	2.92752	0.767299	1.03842	0.577471	0.799893	0.845265	1.24888	0.475867	0.711534	0.09105	1.60885	-0.767883	1.78599	0.0529035	1.58952	-0.844306	1.80206	0.0987285	1.52279	-0.756018	1.70392	0.122464	1.50741	-0.778038	1.70153	0.025492	0.0439015	0.0504375	0.0415895	0.0353755	0.059877	0.0475745	0.0459655	0.025365	0.0473815	0.068322
14	FLOOR	1	6.78836	6.57261	4.85222	6.12009	6.68048	5.48615	2.80999	3.13329	2.20672	1.64586	2.97164	1.92629	0.56409	1.04865	0.529285	0.979341	0.452408	1.22854	0.435117	1.24834	0.0960165	1.52625	-0.755028	1.70738	0.103133	1.37322	-0.839765	1.61552	0.043855	1.41257	-0.851944	1.65232	0.0924655	1.29859	-0.908113	1.5885	0.0256715	0.0384435	0.043975	0.0368524	0.0262005	0.0659035	0.0473895	0.0678547	0.0223205	0.0457635	0.024374
18	FLOOR	1	10.7525	9.35397	4.87643	6.69385	10.0532	5.78514	6.64772	5.38381	2.54615	3.03328	6.01576	2.78972	0.532938	0.933323	0.503696	0.828357	0.4796	0.9527	0.489133	0.844859	0.0822825	1.784	-0.886335	1.99474	0.144049	1.77336	-0.917565	2.00299	0.106408	1.67015	-0.88175	1.89277	0.082496	1.61009	-0.925624	1.85969	0.037205	0.067811	0.03264	0.0566609	0.0504515	0.067215	0.0981865	0.0587402	0.0360135	0.0559645	0.0631045
19	FLOOR	1	16.3708	22.8895	9.04139	13.8101	19.6301	11.4257	9.08764	11.8998	4.43389	7.05797	10.4937	5.74593	0.891406	0.862809	1.02899	0.784231	0.838808	0.871777	1.10085	0.892652	0.062293	1.60413	-0.932775	1.85981	0.0123975	1.47722	-0.829268	1.69597	0.052606	1.48067	-0.868409	1.71921	0.0174725	1.43157	-0.895507	1.6899	0.0489215	0.102504	0.076409	0.100594	0.029715	0.0841865	0.0589035	0.0716736	0.034775	0.072719	0.042742
20	FLOOR	1	5.49705	6.02917	3.64523	4.05171	5.76311	3.84847	2.40572	2.93863	1.58721	2.33275	2.67217	1.95998	0.55542	1.0274	0.496183	1.05928	0.489631	1.20629	0.412052	1.23417	0.081972	1.28622	-0.964353	1.6111	0.048833	1.2923	-0.938213	1.59929	0.11026	1.3911	-0.933179	1.67989	0.064708	1.36621	-0.990996	1.69001	0.040071	0.051456	0.05324	0.0462586	0.0352415	0.0696935	0.0568305	0.063809	0.0578275	0.103888	0.0695105
[truncated: 29 more columns]
